# Supplementary material
Source: Elsevier journal article supplement (https://www.sciencedirect.com/science/article/pii/S0300289622005816)
Supplement: mmc1 [file S0300289622005816:mmc1.pdf]

## SEPAR's Voice

### DIAGNÓSTICO Y TRATAMIENTO DEL DERRAME PLEURAL. RECOMENDACIONES DE LA SOCIEDAD ESPAÑOLA DE NEUMOLOGÍA Y CIRUGÍA TORÁCICA. ACTUALIZACIÓN 2022

#### AUTORES. FILIACIÓN

Maribel Botana Rial. Unidad de Técnicas Broncopleurales. Servicio de Neumología. Hospital Álvaro Cunqueiro (Vigo). Instituto de Investigación Sanitaria Galicia Sur.

Javier Pérez Pallarés. Servicio de Neumología, Hospital General Universitario Santa Lucía, Cartagena, Murcia.

Enrique Cases Viedma. Servicio de Neumología, Hospital Universitario y Politécnico La Fe, Valencia.

Francisco Julián López González. Servicio de Neumología. Hospital Universitario Central de Asturias. Oviedo.

José Manuel Porcel. Unidad de Medicina Pleural. Servicio de Medicina Interna. Hospital Universitario Arnau de Vilanova. IRB Lleida. Universidad de Lleida, Lleida.

María Rodríguez. Departamento de Cirugía Torácica. Clínica Universidad de Navarra. Madrid.

Beatriz Romero Romero. Unidad de Endoscopia Respiratoria. Unidad Médico-Quirúrgica de enfermedades respiratorias. Hospital Virgen del Rocío. Sevilla.

Luis Valdés Cuadrado. Servicio de Neumología. Complejo Hospitalario Universitario de Santiago. Instituto de Investigación Sanitaria de Santiago de Compostela. Departamento de Medicina. Universidad de Santiago de Compostela.

Victoria Villena Garrido. Servicio de Neumología. Hospital Universitario 12 de Octubre. Departamento de Medicina. Facultad de Medicina. Universidad Complutense de Madrid.

Rosa Cordovilla Pérez. Servicio de Neumología. Hospital Universitario de Salamanca.

## RESUMEN

El derrame pleural (DP) es una patología frecuente y compleja que requiere de un manejo especializado y multidisciplinar. Debido a los avances en los últimos años en novedosas técnicas de diagnóstico e innovadoras propuestas terapéuticas centradas en el paciente se hace necesario la actualización de la última normativa. El presente documento pretende proporcionar unas recomendaciones y directrices basadas en un resumen crítico de la literatura sobre aspectos de epidemiología, etiología, diagnóstico, pronóstico y nuevas opciones terapéuticas, así como algunos aspectos de coste-efectividad en las principales entidades de DP.

**Palabras clave:** derrame pleural; diagnóstico; pronóstico; tratamiento; coste-efectividad.

## INTRODUCCIÓN

El derrame pleural (DP) es un problema clínico frecuente<sup>1</sup>. En la última década hemos asistido a un progresivo aumento del conocimiento de la fisiopatología, el diagnóstico, las técnicas de imagen y de biopsia pleural (BP) y nuevas opciones de tratamiento. El presente documento corresponde a la actualización de la normativa sobre el diagnóstico y tratamiento del DP publicada en el año 2014 para proporcionar unas directrices basadas en un resumen crítico de la literatura y que permitan actualizar las recomendaciones previas<sup>2</sup>.

La redacción del manuscrito se basó en un estricto procedimiento metodológico y se redactaron unas recomendaciones para destacar las evidencias de mayor relevancia usando la metodología GRADE<sup>3</sup> (tabla 1). En el artículo que mostramos a continuación se resumen los aspectos más relevantes del diagnóstico diferencial del DP, el manejo del DP trasudado, el DP paraneumónico (DPPN), el DP maligno (DPM) y el DP tuberculoso (DPTB). En el documento completo se incluyen los subapartados: otros derrames pleurales benignos de causa específica (enfermedades sistémicas, patología abdomino-pélvica...) y el diagnóstico y tratamiento de etiologías muy específicas de DP como el hemotórax, el quilotórax y el pseudoquilotórax. El documento completo se puede consultar con el contenido íntegro de la normativa que se encuentra online en la dirección <https://www.separ.es/biblioteca>.

## EPIDEMIOLOGÍA. DIFERENCIACIÓN ENTRE EXUDADO Y TRASUDADO

Los estudios epidemiológicos sobre DP son escasos y mayoritariamente retrospectivos, unicéntricos y procedentes de Europa y Estados Unidos. Se calcula que la incidencia anual de enfermedades de la pleura (DP y neumotórax espontáneo) es de 350-360 casos por 100.000 habitantes asociado a elevados costes sanitarios<sup>4</sup>. Aunque hay más de 60 etiologías reconocidas de DP, alrededor del 75% de los DP se deben a cuatro causas que, por orden de frecuencia, son la insuficiencia cardíaca (IC), el cáncer, la neumonía y la tuberculosis<sup>5</sup>. Es importante resaltar que la formación de líquido pleural (LP) puede justificarse, en ocasiones, por dos o más enfermedades simultáneas en un determinado paciente<sup>6</sup>. Más rara es la presencia de DP bilaterales con una causa distinta en cada hemitórax, referida en la literatura como síndrome de Contarini<sup>7</sup>. El cáncer es la 2ª causa más frecuente de DP<sup>8</sup> y a pesar de que su diagnóstico implica un mal pronóstico, no debemos obviar que la mortalidad de los DPB es igualmente significativa, como mostró un estudio prospectivo de 356 pacientes, en el que las causas cardíacas, renales y hepáticas de DP acarrearón una mortalidad al año del 50%, 46% y 25%, respectivamente<sup>9</sup>.

La diferenciación entre trasudados y exudados se considera el paso inicial en el diagnóstico etiológico de cualquier DP<sup>10,11</sup>. A pesar de todos los avances de los últimos años, en la práctica clínica la distinción entre trasudados y exudados se establece mediante los clásicos criterios de Light<sup>12</sup>. Estos criterios tienen una sensibilidad del 98% para identificar exudados<sup>12,13</sup>. Como contrapartida, clasifican erróneamente como exudados alrededor de un 25-30% de los trasudados. Esta circunstancia es particularmente frecuente en pacientes que toman diuréticos o que poseen LP hemáticos<sup>13</sup>. Aproximadamente el 80% de los trasudados cardíacos categorizados incorrectamente como exudados tienen un gradiente de proteínas >2,5 g/dL, un gradiente de albúmina >1,2 g/dL o unas concentraciones pleurales de NT-proBNP >1500 pg/mL. La seguridad con que se puede afirmar que estamos ante un trasudado es mayor si se cumplen ambos gradientes y si el paciente es >75 años o si el DP es bilateral<sup>14</sup>. En los hidrotórax hepáticos (HH) catalogados equivocadamente como exudados, un cociente entre albúmina LP/suero <0,6 sería un parámetro más sensible que el gradiente de albúmina para establecer su adecuada reclasificación como trasudados<sup>15</sup>. Otras opciones válidas serían la presencia en LP de colesterol >55 mg/dL o de lactato deshidrogenasa (LDH)>67% del límite superior de la normalidad de la LDH sérica para identificar un exudado con una sensibilidad del 97%<sup>15</sup>.

## **DERRAME PLEURAL TRASUDADO**

La IC es la causa más frecuente de DP con una prevalencia que puede superar el 35% en alguna serie<sup>5,11</sup>. La sensibilidad y especificidad diagnóstica de NT-proBNP en LP para el diagnóstico de IC es de 94% y de 91%, respectivamente<sup>16,17</sup>.

En general, tras 2 semanas de tratamiento diurético, el DP desaparecerá en el 89% de los casos. En algunos pocos pacientes los DP pueden ser refractarios<sup>11</sup>. En esas situaciones, la toracocentesis terapéutica (TT) podría ser un enfoque razonable, pero si se requieren más de 1-2/mes, deberían considerarse opciones definitivas como la pleurodesis con talco o el catéter pleural tunelizado (CPT)<sup>18-26</sup> (tabla 2).

El HH es una complicación poco frecuente de la cirrosis hepática<sup>11,27</sup> (tabla 1 suplemento). En general, la presencia de un HH se asocia a un mal pronóstico, con una supervivencia al cabo de un año del 43%<sup>27</sup>. La complicación más frecuente es el empiema bacteriano espontáneo que se observa en el 15% de los pacientes cirróticos con DP<sup>28</sup> (tabla 1 suplemento). En ocasiones, el LP de los pacientes con cirrosis hepática puede ser un quilotórax. Si el HH es refractario a un tratamiento optimizado, el tratamiento definitivo es el trasplante hepático. Si está contraindicado y el DP recurre, una alternativa es implantar un shunt portosistémico intrahepático transyugular (TIPS) o, reparar quirúrgicamente el diafragma. Si aun así el DP recurre, podría intentarse una pleurodesis con talco o la inserción de un CPT<sup>23,29,30</sup> (tabla 2).

En un ensayo clínico randomizado reciente, en el que los pacientes con un DP trasudado refractario (IC, HH o insuficiencia renal) se aleatorizaban a TT de repetición o a la colocación de un CPT, éstos no ofrecieron un mayor control de la disnea. Las TT de repetición tuvieron menos complicaciones, pero los pacientes tratados con un CPT se sometieron a menos procedimientos invasivos, con complicaciones graves poco frecuentes<sup>31</sup>.

La inflamación del espacio pleural puede originar una membrana fibrosa sobre la pleura visceral que impedirá la expansión pulmonar, lo que se conoce como pulmón atrapado y generará un aumento de la presión negativa en el espacio pleural y producirá un DP<sup>32</sup>. El LP sería bioquímicamente un trasudado, si bien en una fase temprana, en la que la enfermedad está todavía activa, las proteínas pueden estar en el rango de exudado<sup>32</sup> (tabla 1 suplemento). Se han propuesto diversas formas para predecir la existencia de un pulmón atrapado: manometría pleural, ecografía torácica en modo M, y la propia sintomatología del paciente durante la evacuación<sup>33</sup>.

Un pequeño porcentaje de DPM se comportan como trasudados debido, probablemente, a que el LP se acumula por una obstrucción del drenaje linfático. La aplicación de modelos

predictores que incluyen variables clínicas, radiológicas y analíticas nos ayudará a determinar en qué trasudados deberá solicitarse una citología para descartar un DPM<sup>34</sup>.

Enfermedades menos frecuentes también pueden producir trasudados, como la diálisis peritoneal que también se han tratado con CPT<sup>35</sup> (tabla 2).

En la Figura 1 se propone un algoritmo de actuación ante un trasudado pleural.

## **DERRAME PLEURAL PARANEUMONICO**

El DPPN es el DP asociado a una infección pulmonar, generalmente una neumonía, un absceso o unas bronquiectasias infectadas aunque en ocasiones no se asocia a una infección pulmonar y se denomina DPI (DP infeccioso). Hasta el 54% de las neumonías estudiadas con ecografía torácica se acompañan de un DPPN durante su curso clínico, y alrededor de un 40% éstos son DPPN complicados o empiemas<sup>36,37</sup>.

Los DPPN no complicados, son los que se encuentran en fase exudativa y, tienen una evolución favorable sólo con terapia antibiótica. Los DPPN complicados se encuentran en la fase fibrinopurulenta y presentan complicaciones como un LP turbio con predominio de polimorfonucleares (PMN) y gérmenes, pH <7,20, glucosa baja y LHD alta y la presencia de tabiques de fibrina en el espacio pleural. Estos DPI, además de tratamiento antibiótico requieren un drenaje torácico o cirugía para su resolución. Por último, en la fase de organización, el empiema, definido por la presencia de pus en el espacio pleural, siempre necesita ser drenado. El modelo pronóstico RAPID basado en la urea sérica basal, la edad del paciente, la purulencia del LP, la fuente de infección y la albúmina sérica es útil para estimar el riesgo de muerte a los tres meses de los pacientes con DPPN, la duración de la estancia hospitalaria y para identificar los DPPN que pueden progresar a un DPPN complicado excepto para los empiemas<sup>38</sup>. Más recientemente el estudio PILOT demostró que los pacientes de bajo riesgo (puntuación RAPID 0-2) tenían una mortalidad a los 3 meses del 2,3%, riesgo medio (puntuación RAPID 3-4) 9,2% de mortalidad y alto riesgo (puntuación RAPID 5-7) 29,3% de mortalidad<sup>39</sup>.

La incidencia de aislamiento de los microorganismos es muy variable y puede ser mejorada con la incorporación de técnicas de reacción en cadena de la polimerasa, la inoculación del LP en botellas de hemocultivo (BACTEC), y del cultivo de la biopsia pleural<sup>40,41</sup>.

El tratamiento adecuado del DPPN incluye el tratamiento antibiótico que debe comenzarse de forma empírica y precoz, incluyendo los gérmenes anaerobios, y ajustarlo al resultado de los estudios microbiológicos<sup>42</sup>. La selección del antibiótico se realizará teniendo en cuenta el

origen comunitario o nosocomial del DP, las características del paciente, las peculiaridades microbiológicas geográficas y locales y la actividad del antibiótico en el LP. Se puede utilizar una combinación de cefalosporina de tercera generación asociada a clindamicina o metronidazol o monoterapia con amoxicilina-clavulánico o piperacilina-tazobactam. Si el origen de la infección es nosocomial, los antibióticos recomendados incluyen piperacilina-tazobactam o meropenem y si la prevalencia del *Staphylococcus aureus* meticilín-resistente en el centro es  $\geq 10\%$  añadir vancomicina o linezolid o daptomicina o bien monoterapia con ceftobiprol o ceftarolina. Los pacientes alérgicos a los beta-lactámicos pueden recibir tratamiento con tigeciclina y aztreonam<sup>42,43</sup>.

El drenaje torácico está indicado en todos los casos de empiema o DPPN complicado. En caso de no disponer de la determinación de pH, la glucosa menor de 60 mg/dl y una LDH mayor de 1.000 U/l son útiles para identificar la necesidad de un drenaje pleural. Debe destacar que puede ser necesario la inserción de un drenaje pleural en caso de una evolución clínica tórpida, aunque el pH sea superior a 7,20. No hay consenso en el tamaño del tubo de drenaje más apropiado, pero los catéteres de pequeño tamaño (10-14F) son más fáciles de colocar, menos traumáticos y más confortables para el paciente y, si se añaden lavados y tratamiento fibrinolítico, su eficacia es similar a los de mayor calibre<sup>44</sup>. El tratamiento enzimático intrapleural debe iniciarse de forma precoz cuando hay septos en la cavidad pleural y en el empiema. Los fibrinolíticos rompen los septos fibrinosos, facilitan el drenaje del LP y previenen la formación de tabiques en la cavidad pleural. Se utilizan principalmente estreptocinasa, urocinasa o alteplasa, y no existe consenso respecto a las dosis a utilizar (tabla 2 suplementaria). No hay suficiente evidencia científica para recomendar un agente o una pauta sobre las demás<sup>44</sup>. En pacientes con DP complicado o empiema, la terapia fibrinolítica intrapleural se asoció con una reducción en la necesidad de intervención quirúrgica y del fracaso general del tratamiento, pero sin evidencia de cambio en la mortalidad<sup>45</sup>. La DNasa, es una enzima que reduce la viscosidad del pus y mejora el drenaje de líquidos muy densos la cual puede indicarse inicialmente o tras fracaso del drenaje torácico simple<sup>46</sup>.

Otras intervenciones como la toracoscopia médica permiten romper mecánicamente las adherencias pleurales y colocar los tubos torácicos bajo visión directa<sup>47</sup>. Los estudios observacionales demostraron una buena eficacia terapéutica en el DPPN y en el empiema cuando se realizaba como procedimiento de primera línea o después de un fracaso tras el drenaje torácico, lo que hace que esta técnica sea extremadamente prometedora, en centros con experiencia, principalmente en ancianos frágiles con comorbilidades en quienes las opciones quirúrgicas podrían estar contraindicadas<sup>47</sup>.

La cirugía, concretamente la videotoracosopia quirúrgica es una opción para los pacientes con derrame tabicado donde fracasa el tratamiento médico, permite el desbridamiento pleural con la consiguiente re-expansión pulmonar y permite controlar el cuadro séptico<sup>48</sup>. En el caso de un empiema altamente organizado con fibrosis pleural extensa puede ser necesario la decorticación.

En la figura 2 se representa un algoritmo para el tratamiento del DPPN.

## **DERRAME PLEURAL TUBERCULOSO**

El DPTB es la afectación extrapulmonar más frecuente junto con la afectación ganglionar y su incidencia en nuestro país se estima entre el 10-19% de los casos de tuberculosis<sup>2,5</sup>. Generalmente el DPTB suele ser un exudado con un recuento de células nucleadas que oscila en la mayor parte de los casos entre 1.000-6.000 células/mm, generalmente con un predominio de linfocitos >50% (en ocasiones incluso > del 90%) o un cociente linfocitos/neutrófilos >0,75. Aquellos pacientes que se encuentran en la fase precoz de la enfermedad (menos de dos semanas) o que presentan un empiema tuberculoso pueden presentar un predominio PMN (entre el 5-17% de los casos). Es excepcional el hallazgo de células mesoteliales > 5% y la eosinofilia >10%<sup>49</sup>.

La adenosina desaminasa (ADA) continúa siendo el principal biomarcador de DPTB<sup>49</sup> con una sensibilidad global de 92% y una especificidad del 90%<sup>50</sup>. La ADA tiene dos isoformas: ADA1 y ADA2 y aunque la ADA2 representa el 88% del total de la actividad y es la isoforma predominante en el DPTB con una sensibilidad y especificidad de 97% y 94%, en la práctica clínica se recomienda la determinación de ADA por presentar igualmente una alta sensibilidad, bajo coste y disponibilidad rápida en los análisis bioquímicos realizados rutinariamente en LP<sup>51</sup>. En áreas de alta prevalencia el DP con predominio linfocitario asociado a ADA >40 U/L, presenta un valor predictivo positivo de 98% y es suficiente para el inicio de tratamiento antituberculoso<sup>51,52</sup>.

Sin embargo, debe tenerse en cuenta que diversas enfermedades pueden incrementar los niveles de ADA en LP, como los DPPN, los linfomas, algunos tumores sólidos o las enfermedades reumáticas sistémicas (especialmente la artritis reumatoide y el lupus eritematoso sistémico), así como otras enfermedades infecciosas más infrecuentes como la brucelosis, la fiebre Q, la histoplasmosis o la coccidiomicosis. A pesar de existir un punto de corte fijo, niveles superiores a 250 U/L sugieren diagnósticos alternativos al DPTB<sup>53</sup>.

El interferón-gamma (INF- $\delta$ ) es una citoquina fundamental en la inmunopatogénesis de la infección por micobacterias. Se libera por linfocitos CD4 activados y su función primordial es actuar como activador de macrófagos aumentando su actividad contra micobacterias. Su valor puede elevarse algunas veces en neoplasias hematológicas y empiemas. Su sensibilidad y especificidad son excelentes para el diagnóstico de DPTB, describiéndose por encima de 85% y 95% respectivamente en función de los estudios<sup>54</sup>.

Los test conocidos como Interferon- $\gamma$  release assays (IGRAS) detectan la liberación de INF- $\gamma$  por células T sensibilizadas en sangre periférica o LP en respuesta a antígenos específicos de las micobacterias codificados en la región del genoma denominada región de diferencia-1. Los resultados de sensibilidad y especificidad en LP parecen ser similares a los de sangre, con una sensibilidad y especificidad del 77% y 71% para muestras de tejido y del 78% y 72% en LP<sup>55</sup>.

La lisozima es una enzima liberada por la actividad bactericida de los macrófagos y PMN, puede presentar niveles elevados en el DPTB, pero también en empiemas o DPM. El cociente de lisozima LP/ suero parece ser útil en el diagnóstico del DPTB si se excluye empiema<sup>49</sup>.

Con el objetivo de evitar la realización de otras pruebas, la combinación de parámetros también ha demostrado mejorar el diagnóstico de DPTB<sup>56-58</sup>.

Con respecto a la microbiología, la baciloscopia convencional en LP requiere una densidad de bacilos ácido alcohol resistentes > 10.000/ml para ser positiva, por lo que presenta una baja rentabilidad (<10%)<sup>59</sup>. Los medios de cultivo sólidos, presentan una baja tasa de crecimiento de micobacterias (<30%) y los medios de cultivo líquidos semiautomáticos presentan rentabilidades más altas en pacientes inmunocompetentes y en pacientes VIH, del 56% y 75%, respectivamente. El uso de las técnicas de reacción en cadena de la polimerasa ha mejorado la rentabilidad de los estudios microbiológicos. La combinación de distintas muestras también mejora la rentabilidad microbiológica hasta del 80%<sup>49</sup>.

El diagnóstico de probabilidad se establece, en aquellos casos con alta sospecha de tuberculosis o en zonas endémicas cuando en el LP existe un cociente linfocitos/ neutrófilos >0,75 y ADA elevado o en los casos en que se demuestra la existencia de granulomas caseificantes en una BP. El diagnóstico definitivo de DPTB se basa en la demostración de *Micobacterium tuberculosis* en esputo, LP o muestras de BP<sup>49,60</sup>. En la figura 3 se representa el algoritmo diagnóstico del DPTB.

A pesar de la buena respuesta al tratamiento antituberculoso, existen casos en los que la evolución puede ser desfavorable y desarrollar complicaciones como el empiema tuberculoso donde puede ser necesario un tratamiento quirúrgico<sup>61</sup>. Otra complicación es la paquipleuritis



residual o el fibrotorax. Si el paciente tiene síntomas se puede realizar una decorticación<sup>61</sup>. El drenaje pleural y la administración de fibrinolíticos puede ser una alternativa terapéutica<sup>62</sup>. En derrames cuantiosos, la TT provocan un alivio sintomático y parece relacionarse con una disminución en la incidencia de engrosamiento pleural residual.

Con respecto al hidroneumotórax, ocasionalmente puede producirse por la rotura pleural de una lesión cavitaria parenquimatosa y puede llegar a cronificarse y precisar drenaje torácico o cirugía<sup>61,62</sup>.

El régimen terapéutico estándar de primera línea es el mismo que el de tuberculosis pulmonar pero existen una consideraciones con respecto a otros tratamientos. La indicación de fármacos con acción antiinflamatoria como los corticoides, no dispone de suficiente evidencia<sup>63,64</sup>. En general, la recomendación es evitar su uso, sin embargo, una excepción pueden ser los pacientes que persisten muy sintomáticos y después de semanas de tratamiento.

En la figura 3 mostramos el algoritmo de diagnóstico de DPTB.

## **DERRAME PLEURAL MALIGNO**

El DPM es el resultado de la infiltración directa de la pleura por células neoplásicas. El DP paramaligno está relacionado con el tumor primario pero sin existir infiltración directa de la pleura por células cancerígenas<sup>65</sup>.

La causa más frecuente de DPM es la enfermedad metastásica, como el cáncer de pulmón y el carcinoma de mama que suponen hasta el 75% de todos los DPM<sup>65</sup>. El mesotelioma supone el 10%<sup>66</sup>.

La tomografía computerizada (TC) con contraste es la técnica de imagen de elección. Existen algunos hallazgos en la TC que nos pueden orientar hacia el origen neoplásico del derrame como la presencia de engrosamiento circunferencial de la superficie pleural, el engrosamiento nodular de la misma, la afectación de la pleura mediastínica o la evidencia de un tumor primario. Estos hallazgos muestran una sensibilidad muy alta, mayor del 88%<sup>67</sup>.

El diagnóstico definitivo de DPM se basa en la demostración de células neoplásicas en el líquido y/o tejido pleural.

La rentabilidad diagnóstica de la citología del LP oscila entre el 49%-91%<sup>68,69</sup>. No es rentable repetir el estudio citológico más de dos veces y se recomienda añadir toma de muestras mediante biopsia cuando se requiera una segunda citología<sup>8,68</sup>.

La BP ecoguiada está especialmente indicada en los casos en los que existe un engrosamiento pleural o masas. En los diferentes estudios publicados la sensibilidad oscila entre 76%-93%, con una especificidad del 100%<sup>70</sup>. También se puede realizar la BP guiada por TC, siendo la rentabilidad similar a la descrita con ecografía<sup>71</sup>.

La BP por toracoscopia supone el gold estandar en el diagnóstico del DPM. La rentabilidad diagnóstica oscila entre el 90%-100%<sup>72</sup>. Puede ser realizada bajo anestesia general en quirófano (toracoscopia quirúrgica) o bajo sedación profunda y anestesia local en la propia sala de endoscopia respiratoria (toracoscopia médica). Cuando nos referimos a toracoscopia médica ésta puede ser rígida o semirrígida. Si comparamos la rentabilidad diagnóstica y las complicaciones entre ambas, los estudios demuestran resultados iguales<sup>73</sup> con una sensibilidad del 95% aproximadamente<sup>73</sup>.

El diagnóstico de un DPM implica una elevada morbimortalidad<sup>8</sup>. Se han propuesto muchos modelos pronósticos que podrían ayudar a la toma de decisiones clínicas, sin embargo, solo uno ha sido validado externamente, la escala de estratificación pronóstica LENT basado en cuatro parámetros: niveles de LDH en LP, la escala ECOG; la proporción neutrófilos /linfocitos en suero y el tipo de tumor<sup>74</sup>.

El tratamiento del DPM tiene como objetivo fundamental disminuir los síntomas y mejorar su calidad de vida. La recomendación actual es ofrecer precozmente un tratamiento definitivo para el control del DPM y no esperar el efecto de las terapias diana<sup>75,76</sup>.

Con respecto a la TT, no se recomienda aplicarla como única medida terapéutica, salvo en pacientes con corta expectativa de vida (menos de 1 mes). Cuando no existe un pulmón atrapado es preferable optar por la realización de una pleurodesis siendo el talco el agente de elección. No existen diferencias al evaluar el éxito de la pleurodesis comparando las dos formas de administración (a través de drenaje torácico o por toracoscopia), siendo la tasa de complicaciones y la mejoría en los síntomas también similar<sup>77,78</sup>.

El CPT permite el tratamiento en los casos en los que la pleurodesis está contraindicada o ha fracasado, cuando existe un pulmón atrapado y/o mal estatus performance<sup>79</sup>. En la actualidad esta opción de tratamiento es también una opción de primera línea permitiendo la ambulatorización del proceso terapéutico<sup>80-82</sup>.

En la figura 4 mostramos un algoritmo de manejo del DPM sintomático.

Existen estudios en marcha prometedores combinando diferentes técnicas para el manejo del DPM (toracoscopia / drenaje pleural tunelizado / pleurodesis con talco en suspensión) (93).

## CONCLUSIONES

EL DP es una patología frecuente y en rápida evolución. Dada la frecuencia y complejidad de la enfermedad pleural y la expansión de los procedimientos pleurales como la BP guiada por imagen, la toracoscopia médica con nuevas indicaciones y el CPT en el manejo del DPM y del DPB se hace necesario actualizar las últimas recomendaciones de diagnóstico y tratamiento del DP. Potenciar la ambulatorización, establecer un diagnóstico rápido y preciso y evitar pruebas innecesarias son puntos clave. Esta normativa brinda la oportunidad de actualizar conocimientos y mejorar la atención integral al paciente con DP de forma estandarizada y de alta calidad.

**Financiación.** El desarrollo y redacción de la normativa se ha realizado sin ninguna financiación externa.

**Anexo.** El documento completo se puede consultar con el contenido íntegro de la normativa que se encuentra online en la dirección <https://www.separ.es/biblioteca>

## BIBLIOGRAFIA

1. Bhatnagar R, Maskell N. Developing a pleural team to run a reactive pleural service. *Clin Med* 2013;13:452-56.
2. Villena Garrido V, Cases Viedma E, Fernández Villar A, de Pablo Gafas A, Pérez Rodríguez E, Porcel Pérez JM, et al. Normativa sobre el diagnóstico y tratamiento del derrame pleural. Actualización. *Arch Bronconeumol* 2014;50:235-49
3. Atkins D, Best D, Briss PA, Eccles M, Falck-Ytter Y, Flottorp S, et al; GRADE Working Group. Grading quality of evidence and strength of recommendations. *BMJ* 2004;328:1490.
4. Mummadi SR, Stoller JK, Lopez R, Kailasam K, Gillespie C, Hahn PY. Epidemiology of Adult Pleural Disease in the United States. *Chest* 2021;160:1534-51.
5. Porcel JM, Esquerda A, Vives M, Bielsa S. Etiology of pleural effusions: analysis of more than 3,000 consecutive thoracenteses. *Arch Bronconeumol* 2014;50:161-5.
6. Bintcliffe OJ, Hooper CE, Rider IJ, Finn RS, Morley AJ, Zahan-Evans N, et al. Unilateral pleural effusions with more than one apparent etiology. A prospective observational study. *Ann Am Thorac Soc* 2016;13:1050-6.
7. Porcel JM, Civit MC, Bielsa S, Light RW. Contarini's syndrome: bilateral pleural effusion, each side from different causes. *J Hosp Med* 2012;7:164-5.

8. Bibby AC, Dorn P, Psallidas I, Porcel JM, Janssen J, Froudarakis M, et al. ERS/EACTS statement on the management of malignant pleural effusions. *Eur Respir J* 2018;52:1800349.
9. Walker SP, Morley AJ, Staddon L, De Fonseka D, Arnold DT, Medford ARL, et al. Nonmalignant pleural effusions: a prospective study of 356 consecutive unselected patients. *Chest* 2017;151:1099-105.
10. Feller-Kopman D, Light R. Pleural Disease. *N Engl J Med*. 2018;378:740-751.
11. Ferreiro L, Porcel JM, Valdés L. Diagnosis and management of pleural transudates. *Arch Bronconeumol* 2017;53:629-636.
12. Light RW, Macgregor MI, Luchsinger PC, Ball WC Jr. Pleural effusions: the diagnostic separation of transudates and exudates. *Ann Intern Med* 1972;77:507-13.
13. Porcel JM, Light RW. Pleural fluid analysis: are Light's criteria still relevant after half a century?. *Clin Chest Med* 2021;42:599-609.
14. Porcel JM, Ferreiro L, Civit C, Valdés L, Esquerda A, Light RW, et al. Development and validation of a scoring system for the identification of pleural exudates of cardiac origin. *Eur J Intern Med* 2018;50:60-64.
15. Bielsa S, Porcel JM, Castellote J, Mas E, Esquerda A, Light RW. Solving the Light's criteria misclassification rate of cardiac and hepatic transudates. *Respirology* 2012;17:721-6.
16. Han ZJ, Wu XD, Cheng JJ, Zhao SD, Gao MZ, Huang HY, et al. Diagnostic accuracy of natriuretic peptides for heart failure in patients with pleural effusions: A systematic review and updated meta-analysis. *Plos One* 2015;10:e0134376.
17. Tsolaki V, Zarogiannis S, Zygoulis P, Kalomenidis I, Jagirdar R, Makris D, et al. Malignant mesothelioma cells secrete natriuretic peptides: data and diagnostic clinical implications. *Respirology* 2020;25:1060-5.
18. Glazer M, Berkman N, Lafair JS, Kramer MR. Successful talc slurry pleurodesis in patients with nonmalignant pleural effusion. *Chest* 2000;117:1404-9.
19. Herlihy JP, Loyalka P, Gnananandh J, et al. PleurX catheter for the management of refractory pleural effusions in congestive heart failure. *Tex Heart Inst J* 2009;36:38-43.
20. Borgeson DD, Defranchi SA, Lam CS, Lin G, Nichols FC. Chronic indwelling pleural catheters reduce hospitalizations in advanced heart failure with refractory pleural effusions. *J Card Fail* 2009;15:S105.
21. Chalhoub M, Harris K, Castellano M, Maroun R, Bourjeily G. The use of the PleurX catheter in the management of non-malignant pleural effusions. *Chron Respir Dis* 2011;8:185-191.
22. Srour N, Potechin R, Amjadi K. Use of indwelling pleural catheters for cardiogenic pleural effusions. *Chest* 2013;144:1603-1608.

23. Bhatnagar R, Reid ED, Corcoran JP, Bagenal JD, Pope S, Clive AO, et al. Indwelling pleural catheters for non-malignant effusions: A multicentre review of practice. *Thorax* 2014;69:959–61.
24. Freeman RK, Ascoti AJ, Dake M, Mahidhara RS. A propensity-matched comparison of pleurodesis or tunneled pleural catheter for heart failure patients with recurrent pleural effusion. *Ann Thorac Surg* 2014;97:1872–6.
25. Majid A, Kheir F, Fashjian M, Chatterji S, Fernandez-Bussy S, Ochoa S, et al. Tunneled pleural catheter placement with and without talc poudrage for treatment of pleural effusions due to congestive heart failure. *Ann Am Thorac Soc* 2016;13:212–6.
26. Patil M, Dhillon SS, Attwood K, Saoud M, Alraiyes AH, Harris K. The management of benign pleural effusions using indwelling pleural catheters — a systematic review and meta-analysis. *Chest* 2017;151:626–35.
27. Badillo R, Rockey DC. Hepatic hydrothorax: Clinical features, management, and outcomes in 77 patients and review of the literature. *Medicine (Baltimore)* 2014;93:135–42.
28. Xiol X, Castellote J, Cortes-Beut R, Delgado M, Guardiola J, Sese E. Usefulness and complications of thoracentesis in cirrhotic patients. *Am J Med* 2001;111:67–9.
29. Hou F, Qi X, Guo X. Effectiveness and safety of pleurodesis for hepatic hydrothorax: A systematic review and meta-analysis. *Dig Dis Sci* 2016; 61:3321–34.
30. Chen A, Massoni J, Jung D, Crippin J. Indwelling tunneled pleural catheters for the management of hepatic hydrothorax: A pilot study. *Ann Am Thorac Soc*. 2016;13:862–6.
31. Walker SP, Bintcliffe O, Keenan E, Stadon L, Evison M, Haris M et al. Randomised trial of indwelling pleural catheters for refractory transudative pleural effusions. *Eur Respir J* 2021; 2101362.
32. Pereyra MF, Ferreiro L, Valdés L. Pulmón no expansible. *Arch Bronconeumol* 2013;49:63–9.
33. Grabczak EM, Krenke R, Zielinska-Krawczyk M, Light RW. Pleural manometry in patients with pleural diseases – the usefulness in clinical practice. *Respir Med* 2018;145:230–236.
34. Ferreiro L, Gude F, Toubes ME, Lama-López A, Suárez-Antelo J, San-José E, et al. Predictive models of malignant transudative pleural effusions. *J Thorac Dis* 2017;9:106–16.
35. Potechin R, Amjadi K, Srour N. Indwelling pleural catheters for pleural effusions associated with end-stage renal disease: A case series. *Ther Adv Respir Dis* 2015;9:22–7.
36. Reissig A, Copetti R, Mathis G, et al. Lung ultrasound in the diagnosis and follow-up of community-acquired pneumonia: a prospective, multicenter, diagnostic accuracy study. *Chest* 2012;142:965–972.

37. Cargill TN, Hassan M, Corcoran JP, et al. A systematic review of comorbidities and outcomes of adult patients with pleural infection. *Eur Respir J* 2019; 54: 1900541.
38. Rahman NM, Kahan BC, Miller RF, et al. A clinical score (RAPID) to identify those at risk for poor outcome at presentation in patients with pleural infection. *Chest* 2014; 145: 848–55.
39. Corcoran JP, Psallidas I, Gerry S, Piccolo F, Koegelenberg CF, Saba T et al. Prospective validation of the RAPID clinical risk prediction score in adults patients with pleural infection: the PILOT study. *Eur Respir J* 2020; 56(5): 2000130
40. Psallidas I, Kanellakis NI, Bhatnagar R, et al. A pilot feasibility study in establishing the role of ultrasound-guided pleural biopsies in pleural infection (the AUDIO study). *Chest* 2018;154:766–72.
41. Lee YCG, Fitzgerald DB. Pleural biopsy to capture causative microbe: A new piece of the pleural infection jigsaw. *Chest* 2018;154:743–5.
42. Hassan M, Cargill T, Harriss E, Asciak R, Mercer RM, Bedawi EO, et al. The microbiology of pleural infection in adults: a systematic review. *Eur Respir J* 2019;54:1900542.
43. Torres A, Barberán J, Ceccato A, Martín-Loeches I, Ferrer M, Menéndez R et al. Neumonia intrahospitalaria. Normativa de la Sociedad Española de Neumología y Cirugía Torácica (SEPAR). Actualización 2019. *Arch Bronconeumol* 2020;56:11-9
44. Light RW. Pleural controversy: optimal chest tube size for drainage. *Respirology* 2011;16:244-48.
45. Altmann ES, Crossingham I, Wilson S, Davies HR. Intrapleural fibrinolytic therapy versus placebo, or a different fibrinolytic agent, in the treatment of adult parapneumonic effusion and empyema. *Cochrane Database Syst Rev* 2019(10):CD002312.
46. Chaddha U, Agrawal A, Feller-Kopman D, Kaul U, Shojaee S, Maldonado F, et al., Use of fibrinolytics and deoxyribonuclease in adult patients with pleural empyema: a consensus statement, *Lancet Respir Med* 2012;9: 1050–64.
47. Mondoni M, Sadari L, Trogu F, Tenaneo S, Carlucii P, Ghelma F, et al. Medical thoracoscopy treatment for pleural infections: a systematic review and meta-analysis. *BMC Pulm Med* 2021;21:127
48. Bedawi EO, Hassan M, Rahman NM. Recent development in the management of pleural infection: a comprehensive review. *Clin Resp J* 2018;12: 2309-2320.
49. Shaw JM, Diacon AH, Koegelenberg CFN. Tuberculous pleural effusion. *Respirology* 2019;24:962-971.
50. Aggarwal AN, Agarwal R, Sehgal IS, Dhooria S. Adenosine deaminase for diagnosis of tuberculous pleural effusion: A systematic review and meta-analysis. *PLoS ONE* 2019;14.

51. Zemlin AE, Burgess LJ, Carstens ME. The diagnostic utility of adenosine deaminase isoenzymes in tuberculous pleural effusions. *Int J Tuberc Lung Dis* 2009;13:214–20.
52. Skouras VS, Kalomenidis I. Pleural fluid tests to diagnose tuberculous pleuritis. *Curr Opin Pulm Med* 2016;22:367–77.
53. Porcel JM, Esquerda A, Bilela S. Diagnostic performance of adenosine deaminase activity in pleural fluid: a single center experience with over 2100 consecutive patients. *Eur J Intern Med* 2010;21:419–23
54. Aggarwal AN, Agarwal R, Dhooira S, Prasad KT, Sehgal IS, Muthu V. Comparative accuracy of pleural fluid unstimulated interferon-gamma and adenosine deaminase for diagnosing pleural tuberculosis: A systematic review and meta-analysis. *PLoS One* 2021;16:e0253525.
55. Aggarwal AN, Agarwal R, Gupta D, Dhooira S, Behera D. Interferon Gamma Release Assays for Diagnosis of Pleural Tuberculosis: a Systematic Review and Meta-Analysis. *J Clin Microbiol* 2015;53:2451–9.
56. Roofghayee ND, Marjani M, Dezfouli NK, Tabarsi P, Moniri A, Varahram M et al Potencial diagnostic value of pleural fluid cytokines levels for tuberculous pleural effusion. *Sci Res* 2021;11:660
57. Wang J, Liu J, Xie X, Shen P, He J, Zeng Y. The pleural fluid lactate dehydrogenase/adenosine deaminase ratio differentiates between tuberculous and parapneumonic pleural effusions. *BMC Pulm Med* 2017;17:168.
58. Lee J, Yoo SS, Lee SY, Cha SI, Park JY, Kim CH. Pleural fluid adenosine deaminase/serum C-reactive protein ratio for the differentiation of tuberculous and parapneumonic effusions with neutrophilic predominance and high adenosine deaminase levels. *Infection* 2017;45:59–65.
59. Ko Y, Kim C, Chang B, Lee S-Y, Park SY, Mo E-K, et al. Loculated Tuberculous Pleural Effusion: Easily Identifiable and Clinically Useful Predictor of Positive Mycobacterial Culture from Pleural Fluid. *Tuberc Respir Dis* 2017;80:35
60. Ko Y, Song J, Lee S-Y, Moon J-W, Mo E-K, Park JY, et al. Does repeated pleural culture increase the diagnostic yield of Mycobacterium tuberculosis from tuberculous pleural effusion in HIV-negative individuals? *PLoS ONE* 2017;12:e0181798.
61. Kumar A, Asaf BB, Lingaraju VC, Yendamuri S, Pulle M v., Sood J. Thoracoscopic Decortication of Stage III Tuberculous Empyema Is Effective and Safe in Selected Cases. *Ann Thor Surg* 2017;104:1688–94
62. Thommi G, Shehan JC, Robison KL, Christensen M, Backemeyer LA, Mcleay MTM. A double blind randomized cross over trial comparing rate of decortication and efficacy of intrapleural instillation of alteplase vs placebo in patients with empyemas and complicated parapneumonic effusions. *Respir Med* 2012;106:716–723.

63. Ryan H, Yoo J, Darsini P, Group CID. Corticosteroids for tuberculous pleurisy. *Cochrane Database Syst Rev* 2017;2017:CD001876
64. Xie S, Lu L, Li M, Xiong M, Zhou S, Zhang G, et al. The efficacy and safety of adjunctive corticosteroids in the treatment of tuberculous pleurisy: a systematic review and meta-analysis. *Oncotarget* 2017;8:83315-22
65. Asciak R, Rahman NM. Malignant pleural effusion: from diagnostics to therapeutics. *Clin Chest Med*. 2018;39: 181-193.
66. Sinn K, Mosleh B, Hoda Ma. Malignant pleural mesotelioma: recent developments. *Curr Opin Oncol* 2021;33:80-8.
67. Tsim S, Stobo DB, Alexander L, Kelly C, Blyth K. The diagnostic performance of routinely acquired and reported computed tomography imaging in patients presenting with suspected pleural effusion. *Lung Cancer* 2017;103:38-43
68. Froudarakis ME, Plojoux J, Kaspi E. Positive pleural cytology is an indicator for visceral pleural invasion in metastatic pleural effusions. *Clin Respir J* 2018;12:1011-6.
69. Aisner DL, Rumery MD, Merrick DT, Kondo KL, Nijmeh H, Linderman DJ, et al. Tips and techniques for maximizing small biopsy and cytology specimens for molecular and ancillary testing: the university of colorado experience. *Arch Pathol Lab Med*. 2016; 140: 1206-20.
70. Lin Z, Wu D, Wang J, Wang C, Huang M. Diagnostic value of ultrasound-guided needle biopsy in undiagnosed pleural effusions: a systematic review and meta-analysis. *Medicine (Baltimore)* 2020;99:e21076
71. Park J, Park B, Lim JK, Shin KM, Lee J, Kim CH, et al. Ultrasound – guided percutaneous Needle biopsy for small pleural lesions: diagnostic yield and impact of Ct and ultrasound characteristics. *Am J Roentgenol* 2021; 217: 699 -706.
72. Avasarala SK, Lentz RJ, Maldonado F. Medical thoracoscopy. *Clin Chest Med* 2021;42:751-66.
73. Agarwal R, Aggarwal AN, Gupta D. Diagnostic accuracy and safety of semirigid thoracoscopy in exudative pleural effusions: a meta-analysis. *Chest* 2013;144:1857-67.
74. Clive AO, Kahan BC, Hooper CE, Bhatnagar R, Morley AJ, Zahan-Evans N, et al. Predicting survival in malignant pleural effusion: development and validation of the LENT prognostic score. *Thorax* 2014;69:1098-104.
75. Chiang KY, Chung- Man Ho, Chong P, Tam TC, Lam DC, Ip MS, et al. Role of early definitive management for newly diagnosed malignant pleural effusion related to lung cancer. *Respirology* 2020; 25: 1167-73.



76. Schwalk AJ, Ost DE, Saltjeral SN, De La Garza H, Casal RF, Jimenez CA, et al. Risk factors for and time to recurrence of symptomatic malignant pleural effusion in patients with metastatic non- small lung cancer with EGFR or ALK mutations. *Chest* 2021; 159: 1256-64.
77. Dipper A, Jones HE, Bhatnagar R, Preston NJ, Maskell N, Clive AO. Interventions for the management of malignant pleural effusions: a network meta – analysis. *Cochrane Database Syst Rev* 2020;4: D010529.
78. Bhatnagar R, Piotrowska HEG, Laskawiec-Szkonter M, Kahan BC, Luengo- Fernandez R, Peppereli JCT et al. Effect or Thoracoscopic talc poudrage vs talc slurry via chest tube on pleurodesis failure among patients with malignant pleural effusions: a randomized clinical trial. *JAMA* 2020; 323:60-9.
79. Miller RJ, Chrissian AA, Lee G, Rahman NM, Tremblay A, Hsia DW, et al. AABIP Evidence-informed guidelines and expert panel report for the management of indwelling pleural catheters. *J Bronchol Intervent Pulmonol* 2020; 27:229-45.
80. Davies HE, Mishra EK, Kahan BC, Wrightson JM, Stanton AE, Guhan A et al. Effect o fan indwelling pleural catheter vs chest tuve and tlac pleurodesis for relieving dyspnea in patients with malignant pleural effusion: the TIME2 randomized controlled trial. *JAMA* 2012;307:2383-9.
81. Thomas R, Fysh ETH, Smith NA, Lee P, Kwan BCH, Yap E et al. Effect of and indwelling pleural catheter vs talc pleurodesis on hospitalization days in patients with malignant pleural effusion: the AMPLE randomized clinical trial. *JAMA* 2017;318:1903-12.
82. Bhatnager R, Keenan KE, Morley AJ, Kahan BC, Stanton AE, Haris M et al. Outpatient talc adminitration by indwelling pleural catheter for malignant effusion. *N Engl J Med* 2018;378:1313-22.
83. Agrawal A, Murgu S. Multimodal approach to the management of malignant pleural effusions: role of thoracoscopy with pleurodesis and tunneled indwelling pleural catheters. *J Thorac Dis* 2020;12: 2803 -11.

Figura 1. Algoritmo de actuación ante un trasudado pleural.

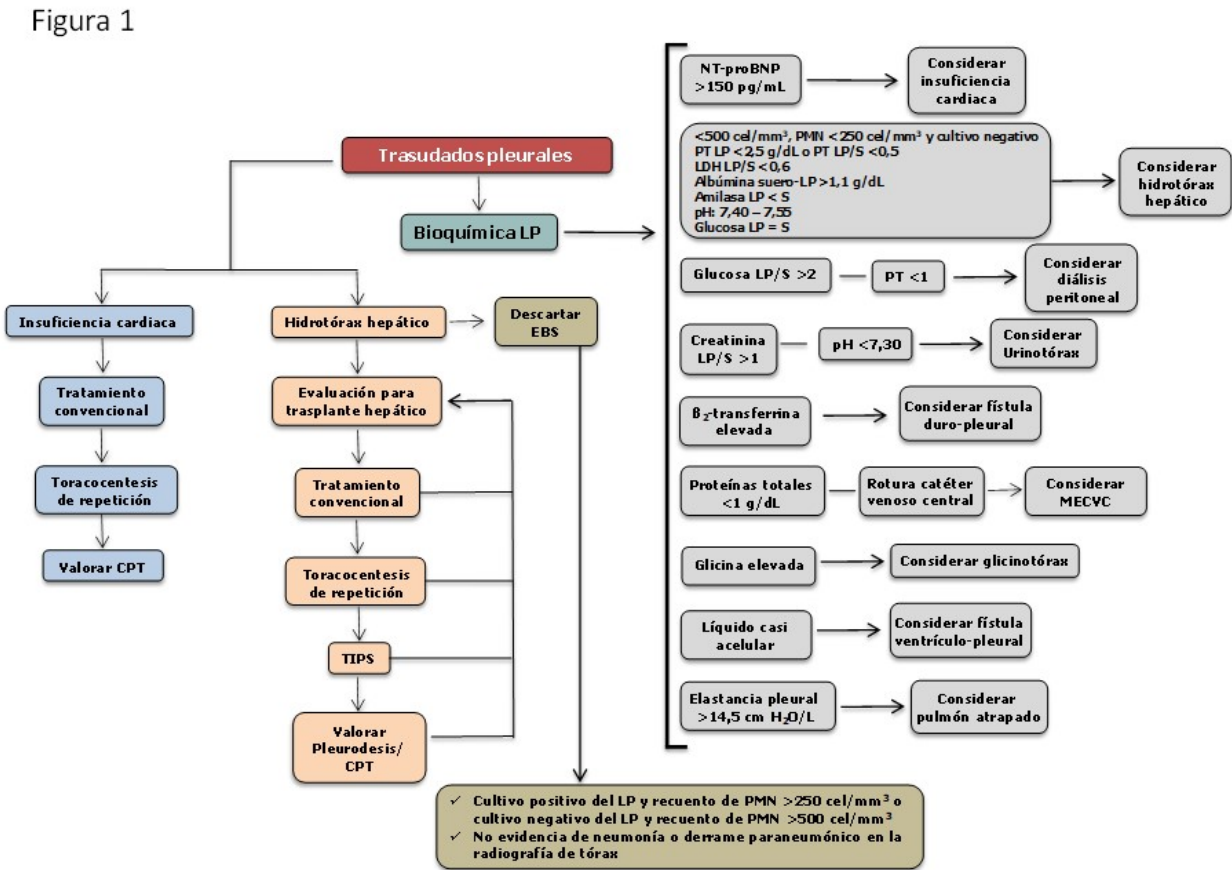

**Pie de figura:** CPT, catéter pleural tunelizado; EBS, empiema bacteriano espontáneo; LDH, lactato deshidrogenasa; LP, líquido pleural; LP/S, cociente líquido pleural/suero; MECVC, migración extravascular de un catéter venoso central; NT-proBNP, fracción amino-terminal del propéptido natriurético cerebral; PMN, polimorfonucleares; PT, proteínas totales; TIPS, shunt portosistémico intrahepático transyugular

Figura 2. Algoritmo para el tratamiento del derrame paraneumónico.

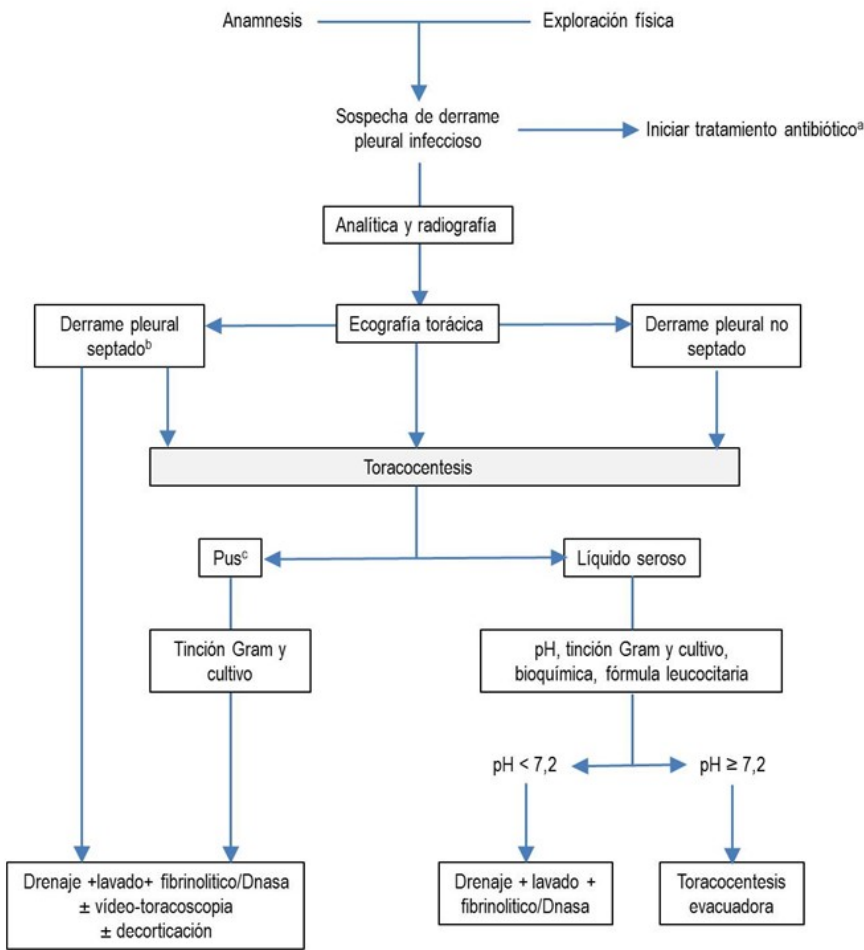

**Pie de figura:**

<sup>a</sup>En todos los casos se debe de comenzar con un tratamiento antibiótico empírico temprano, para ajustarlo luego al resultado de los cultivos. Otras indicaciones de drenaje son la existencia de fístula broncopleurale o pleuroparietal, nivel hidroaéreo, gran volumen o estado séptico.

<sup>b</sup>La presencia de septos también se puede basar en los hallazgos de la tomografía computarizada o de la radiografía torácica.

<sup>c</sup>También si el líquido pleural es turbio o maloliente.

Figura 3. Algoritmo para el diagnóstico del derrame pleural tuberculoso

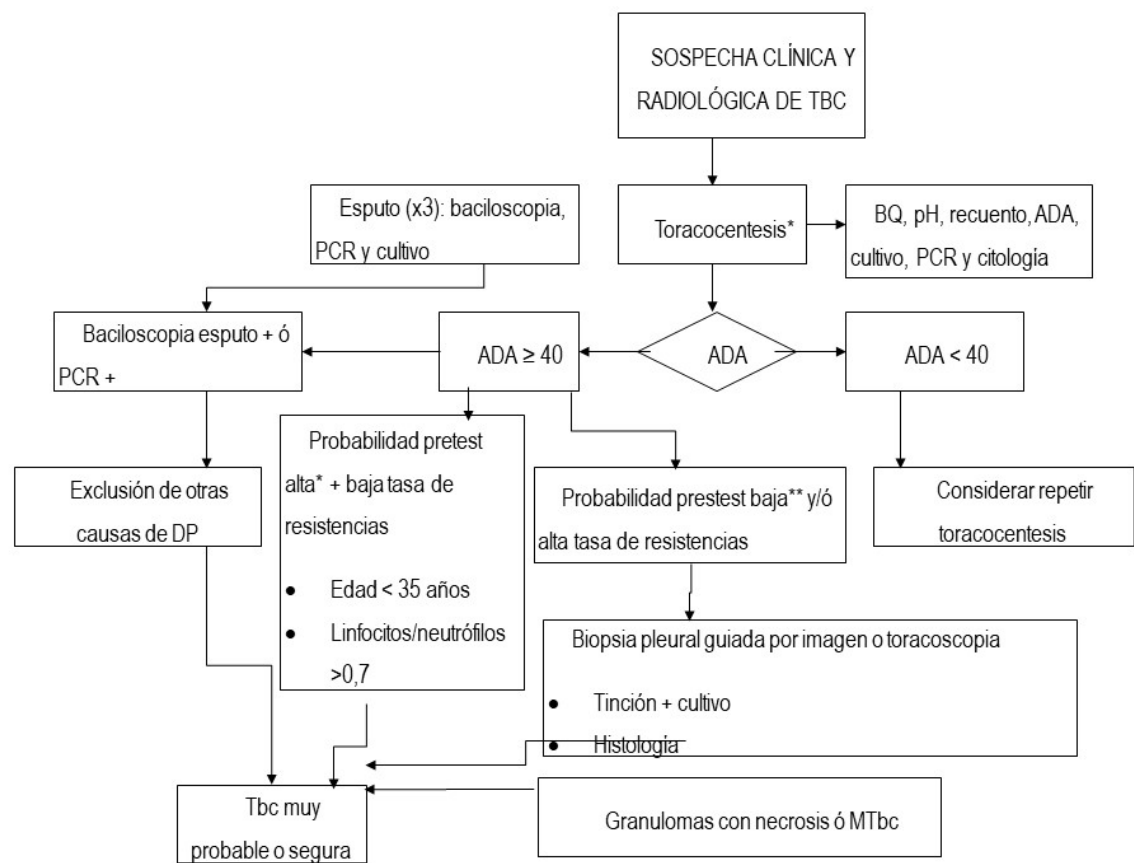

Pie de figura: TBC, tuberculosis; ADA, adenosina desaminasa; BQ, bioquímica; DP, derrame pleural

Figura 4. Algoritmo de tratamiento de derrame pleural maligno.

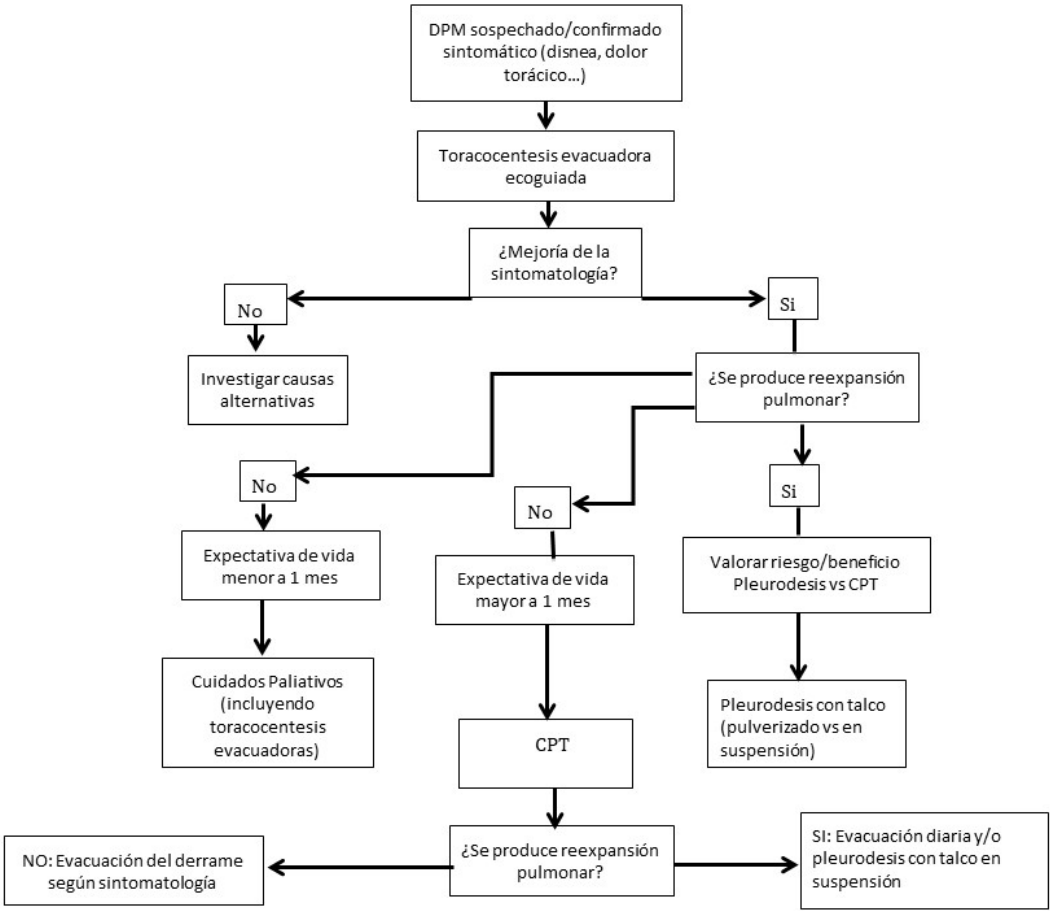

Pie de figura: DPM, derrame pleural maligno; CPT, catéter pleural tunelizado

## RESUMEN GRÁFICO

# DIAGNÓSTICO Y TRATAMIENTO DEL DERRAME PLEURAL (DP). ACTUALIZACIÓN 2022

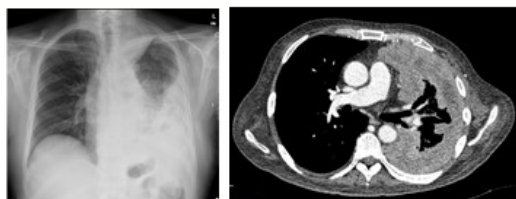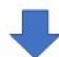

Patología muy frecuente  
Necesario manejo multidisciplinar

Avances diagnósticos y terapéuticos  
Desarrollo de Unidades de Pleura

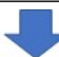

Actualización de la literatura y nuevas recomendaciones (metodología GRADE)

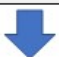

Epidemiología      Etiología      Diagnóstico      Pronóstico      Tratamiento      Coste-efectividad

| Capítulos                                                                                                     | Otros capítulos ( <a href="https://www.separ.es/biblioteca">https://www.separ.es/biblioteca</a> )                                    |
|---------------------------------------------------------------------------------------------------------------|--------------------------------------------------------------------------------------------------------------------------------------|
| Diagnóstico diferencial del DP<br>Manejo del DP trasudado<br>DP paraneumónico<br>DP maligno<br>DP tuberculoso | Otros DP de causa específica (enfermedades sistémicas, patología abdomino-pélvica...)<br>Hemotórax<br>Quilotórax<br>Pseudoquilotórax |



**Tabla 1. Actualización de las principales recomendaciones en aspectos sobre prevalencia, diagnóstico, y tratamiento en diferentes etiologías de derrame pleural**

|                                                                                                                                                                                                                                              |          |
|----------------------------------------------------------------------------------------------------------------------------------------------------------------------------------------------------------------------------------------------|----------|
| Las causas más frecuentes de DP son la IC, el DPM y entre los DPB, el DPTB y el DPI.                                                                                                                                                         | GRADE A1 |
| La categorización de un DP como trasudado o exudado se debe realizar mediante los criterios de Light.                                                                                                                                        | GRADE A1 |
| Cuando no se dispone de una muestra sanguínea, la diferenciación entre trasudado y exudado pleural se puede efectuar mediante la determinación de las concentraciones de colesterol y LDH en LP.                                             | GRADE B1 |
| Los DP por IC identificados erróneamente como exudados por los criterios de Light se pueden reclasificar adecuadamente calculando los gradientes de proteína o albúmina entre suero y LP, o midiendo las concentraciones de NT-proBNP en LP. | GRADE B1 |
| En los DPB el porcentaje de pleurodesis espontánea con CPT es menor que en el DPM                                                                                                                                                            | GRADO C2 |
| En los DPB el porcentaje de complicaciones es similar a la de los CPT implantados en el DPM                                                                                                                                                  | GRADO C2 |
| La ecografía torácica ayuda a identificar DP pequeños y facilita la elección del mejor lugar para la toracocentesis y la colocación del drenaje pleural                                                                                      | GRADE B1 |
| Ante la sospecha de un DPI debe realizarse siempre una toracocentesis y extraer hemocultivos                                                                                                                                                 | GRADE B1 |
| El pH es el mejor marcador para tomar decisiones sobre la conveniencia o no de colocar un drenaje pleural                                                                                                                                    | GRADE A1 |
| El tratamiento antibiótico debe comenzarse de forma empírica y precoz, incluyendo la cobertura de los gérmenes anaerobios                                                                                                                    | GRADE C2 |
| La selección del antibiótico se realizará teniendo en cuenta el origen comunitario o nosocomial del DPI, las características del paciente, las peculiaridades microbiológicas geográficas y locales y, la actividad del                      | GRADE B2 |

|                                                                                                                                                                                                 |          |
|-------------------------------------------------------------------------------------------------------------------------------------------------------------------------------------------------|----------|
| antibiótico en el LP                                                                                                                                                                            |          |
| El drenaje torácico está indicado en todos los casos de empiema o DPI complicado definido por pH < 7,20, derrame septado o gérmenes en el LP                                                    | GRADE B2 |
| La ADA sigue constituyendo uno de los métodos más sensible, específico, de bajo coste y amplia distribución para el diagnóstico de DPTB y debe ser solicitado de rutina en la analítica de LP   | GRADE A1 |
| La repetición de la toracocentesis puede demostrar elevación de la ADA previamente disminuido                                                                                                   | GRADE B2 |
| El uso de los medios automatizados de cultivo del LP han aumentado la rentabilidad diagnóstica con menor tiempo hasta la obtención de los resultados microbiológicos                            | GRADE A1 |
| Las técnicas de detección de genoma de <i>Micobacterium Tuberculosis</i> en LP o tejido pleural presentan baja sensibilidad y alta especificidad por lo que pueden ser útiles en el diagnóstico | GRADE B2 |
| IFN- $\gamma$ presenta una alta sensibilidad y especificidad, pero su coste y dificultad de determinación limitan su uso                                                                        | GRADE B1 |
| La histología junto con determinaciones analíticas del LP y microbiología, constituye el método diagnóstico de elección en áreas de baja prevalencia y DP de etiología indeterminada            | GRADE B1 |
| La identificación microbiológica o molecular de <i>Micobacterium Tuberculosis</i> en LP o tejido constituye el gold estándar del diagnóstico                                                    | GRADE A1 |
| El tratamiento esteroideo es controvertido y debe ser considerado únicamente en pacientes muy sintomáticos de forma persistente                                                                 | GRADE C2 |
| En presencia de loculaciones puede considerarse el uso de fibrinolíticos                                                                                                                        | GRADE B2 |
| El drenaje de LP debe considerarse en derrames masivos o sintomáticos                                                                                                                           | GRADE A2 |
| Puede considerarse la decorticación en pacientes con fibrotórax post-DPTB                                                                                                                       | GRADE B2 |
| La rentabilidad de la citología del LP está relacionada con el tipo de tumor, la carga tumoral, la calidad de la muestra y la experiencia del patólogo., pero                                   | GRADE B2 |

|                                                                                                                                                                                                                                                                                                                                                                                                                                                                                                                                                                                                                                                                                                                                                                                                                                                                 |                                                                                                                                       |
|-----------------------------------------------------------------------------------------------------------------------------------------------------------------------------------------------------------------------------------------------------------------------------------------------------------------------------------------------------------------------------------------------------------------------------------------------------------------------------------------------------------------------------------------------------------------------------------------------------------------------------------------------------------------------------------------------------------------------------------------------------------------------------------------------------------------------------------------------------------------|---------------------------------------------------------------------------------------------------------------------------------------|
| <p>repetir más de 2 veces el estudio citológico no aumenta la rentabilidad diagnóstica.</p> <p>Debe realizarse diagnóstico inmunohistoquímico y molecular en los casos de DPM.</p> <p>Debe realizarse tratamiento definitivo con técnicas pleurales en los DPM recidivantes sintomáticos (*) como la pleurodesis con talco (vía torascopia o por tubo de drenaje) si no existe pulmón atrapado (**) y con el uso del CPT como tratamiento de primera línea (***)</p>                                                                                                                                                                                                                                                                                                                                                                                            | <p>GRADE C3</p> <p>GRADE B2*</p> <p>GRADE A1**</p> <p>GRADE A2***</p>                                                                 |
| <p>El DP inespecífico post-cirugía cardíaca involucra varios mecanismos de producción fisiopatológicos.</p> <p>La sospecha de otra etiología o si el DP post-cirugía cardíaca es sintomático obliga a realizar procedimientos pleurales diagnósticos y/o terapéuticos (*), incluyendo la necesidad de procedimientos quirúrgicos como una decorticación si existe pulmón atrapado (**).</p>                                                                                                                                                                                                                                                                                                                                                                                                                                                                     | <p>GRADE B2</p> <p>GRADE B2*</p> <p>GRADE C2**</p>                                                                                    |
| <p>La profilaxis antibiótica en pacientes con hemotórax solo se recomienda cuando van a ser sometidos a una intervención quirúrgica o han sufrido un traumatismo penetrante en el tórax .</p> <p>La tomografía computerizada es clave en los hemotórax en evolución o retenidos .</p> <p>El tratamiento dependerá de la situación hemodinámica y respiratoria del paciente .</p> <p>En el tratamiento del hemotórax, la colocación de un drenaje torácico es la primera opción (*). La exploración quirúrgica está indicada en caso de un débito &gt; de 1.500 ml en 24 horas (**) y en los hemotórax retenidos o de mala evolución (***).</p> <p>En pacientes con elevado riesgo quirúrgico se puede considerar el tratamiento fibrinolítico en los hemotórax retenidos.</p> <p>Para la malformación arteriovenosa pulmonar, el tratamiento de elección es</p> | <p>GRADE B2</p> <p>GRADE B2</p> <p>GRADE B2</p> <p>GRADE C3*</p> <p>GRADE B2**</p> <p>GRADE A1***</p> <p>GRADE B3</p> <p>GRADE B2</p> |

|                                                                                                                                                                                     |          |
|-------------------------------------------------------------------------------------------------------------------------------------------------------------------------------------|----------|
| la embolización .                                                                                                                                                                   | GRADE B2 |
| Quilotórax y pseudoquilotórax representan formas raras de DP, pero su diagnóstico y tratamiento es diferente).                                                                      | GRADE B3 |
| Cuando no existe respuesta al tratamiento conservador en los quilotórax malignos o donde no se identifica la disrupción del ducto torácico, la pleurodesis es una opción aceptable. | GRADE C2 |
| En la mayoría de los casos el pseudoquilotórax se asocia con un curso benigno y no necesita tratamiento específico.                                                                 | GRADE C3 |
| La TT,pleurodesis o decortación pueden ser alternativas en pseudoquilotórax recurrentes y sintomáticos.                                                                             |          |

**Abreviaturas:** ADA: adenosina desaminasa; CPT: catéter pleural tunelizado; DP: derrame pleural; DPM: derrame pleural maligno; DPB: derrame pleural benigno; DPI: derrame pleural infeccioso; DPTB: derrame pleural tuberculoso; IC: insuficiencia cardíaca; INF-γ: Interferón-gamma; LDH: lactato deshidrogenasa; LP: líquido pleural; TT: toracocentesis terapéutica.

**Tabla 2. Resultados del tratamiento en los trasudados pleurales**

| <b>Pleurodesis</b>                |                  |                                 |                                                      |                            |                                 |                                                                                    |                            |                                 |
|-----------------------------------|------------------|---------------------------------|------------------------------------------------------|----------------------------|---------------------------------|------------------------------------------------------------------------------------|----------------------------|---------------------------------|
| <b>Insuficiencia cardiaca</b>     |                  |                                 |                                                      | <b>Hidrotórax hepático</b> |                                 |                                                                                    | <b>Insuficiencia renal</b> |                                 |
| <b>Autor</b>                      | <b>Pacientes</b> | <b>Éxito<sup>II</sup> n (%)</b> | <b>Complicaciones</b>                                | <b>Pacientes</b>           | <b>Éxito<sup>II</sup> n (%)</b> | <b>Complicaciones</b>                                                              |                            |                                 |
| Glazer <sup>18</sup>              | 6                | 5 (83,3)                        | No formación de LP                                   | 4                          | 3 (75)                          |                                                                                    |                            |                                 |
| Hou <sup>29</sup>                 |                  |                                 |                                                      | 206                        | 148 (71,8)                      |                                                                                    |                            |                                 |
| <b>Catéter pleural tunelizado</b> |                  |                                 |                                                      |                            |                                 |                                                                                    |                            |                                 |
| <b>Insuficiencia cardiaca</b>     |                  |                                 |                                                      | <b>Hidrotórax hepático</b> |                                 |                                                                                    | <b>Insuficiencia renal</b> |                                 |
| <b>Autor</b>                      | <b>Pacientes</b> | <b>Éxito<sup>II</sup> n (%)</b> | <b>Complicaciones</b>                                | <b>Pacientes</b>           | <b>Éxito<sup>II</sup> n (%)</b> | <b>Complicaciones</b>                                                              | <b>Pacientes</b>           | <b>Éxito<sup>II</sup> n (%)</b> |
| Herlihy <sup>19</sup>             | 5                | NA                              | Empiema (2/5; 40% con una muerte)                    |                            |                                 |                                                                                    |                            |                                 |
| Borgeson <sup>20</sup>            | 22               | 9 (40,9)                        | Infección pleural (2; 8%) y oclusión catéter (2; 8%) |                            |                                 |                                                                                    |                            |                                 |
| Chalhoub <sup>21</sup>            | 13               | 13 (100)                        | Ninguna                                              | 8                          | 8 (100)                         | Infección local (1)                                                                |                            |                                 |
| Srour <sup>22</sup>               | 38               | 11 (28,9)                       | Neumotórax (5;11,6%)                                 |                            |                                 |                                                                                    |                            |                                 |
| Bhatnagar <sup>23</sup>           | 9                | 4 (44)                          | Fallo renal agudo (1/9; 11%)                         | 19                         | 2 (11)                          | Infección pleural (1) insuficiencia renal (1), loculación (1) y desplazamiento (1) |                            |                                 |
| Freeman <sup>24</sup>             | 40               | 14 (35)                         | Ninguna                                              |                            |                                 |                                                                                    |                            |                                 |
| Majid <sup>25</sup>               | 15*<br>28†       | 12 (80)<br>7 (25)               | Ninguna<br>Empiema (2/28; 7%)                        |                            |                                 |                                                                                    |                            |                                 |
| Chen <sup>30</sup>                |                  |                                 |                                                      | 24                         | 8 (33)                          | Infección pleural (4; 16,7%)                                                       |                            |                                 |
| Potechin <sup>35</sup>            |                  |                                 |                                                      |                            |                                 |                                                                                    | 8                          | 3 (37,5)                        |

<sup>II</sup>Eficacia de la pleurodesis; \*Talcaje previo con toracoscopia antes del catéter pleural tunelizado; †Solamente catéter pleural tunelizado. NA, no aportad
